# Supplementary material for: Assessing risk factors for early hip osteoarthritis in activity-related hip pain: a Delphi study
Source: HighWire-hosted journal article supplement (doi:10.1136/bmjopen-2015-007609), 2015-09-01

ADDITIONAL DATA FILE 3 – SUBGROUP ANALYSIS OF RESULTS BY RESEARCH BACKGROUND AND SPECIALTY

Radiology

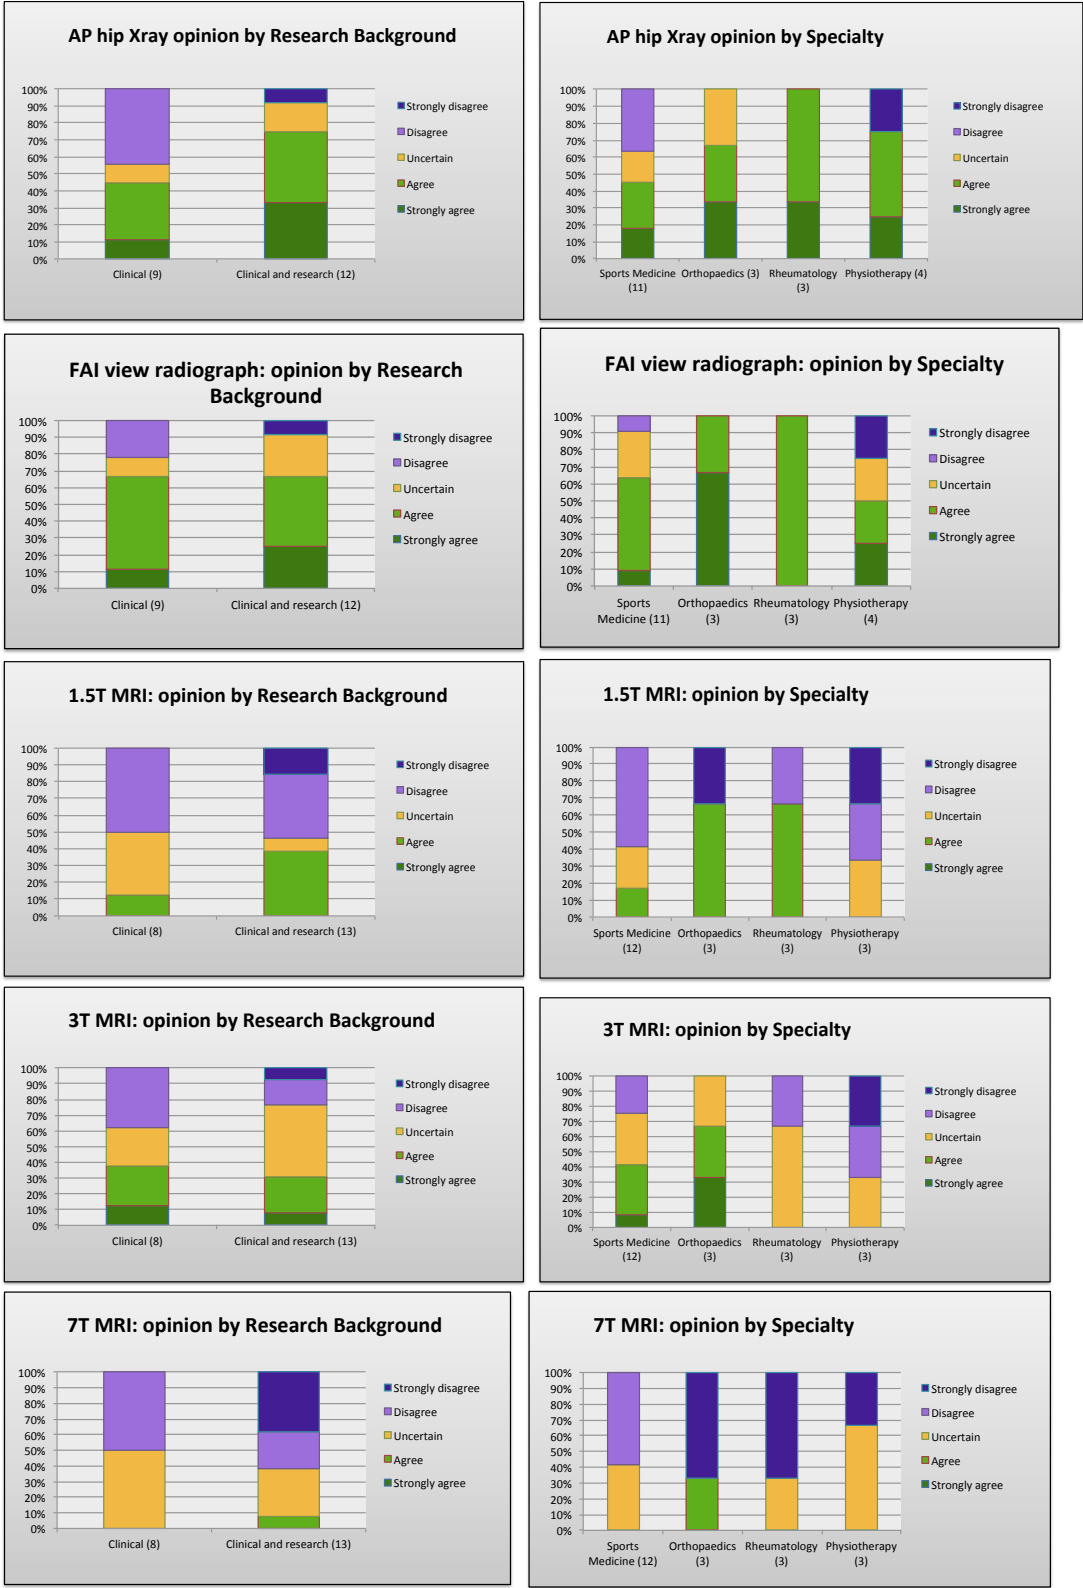

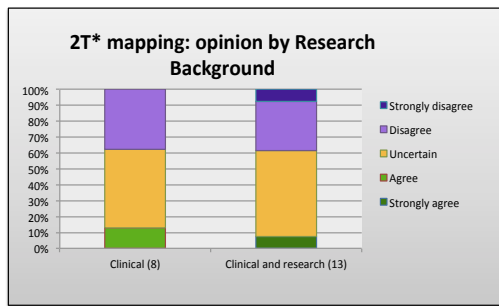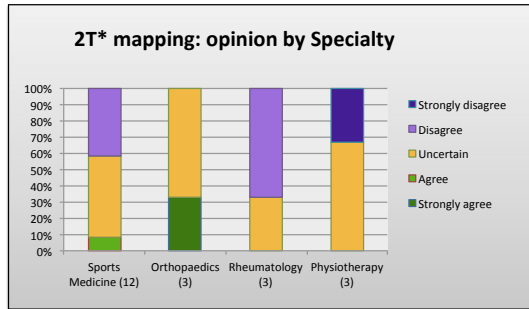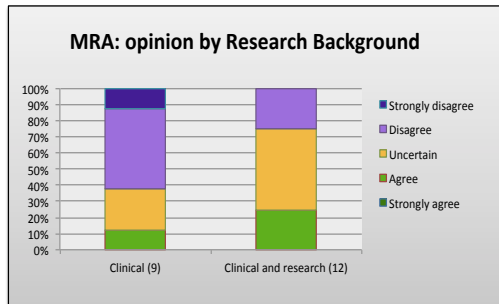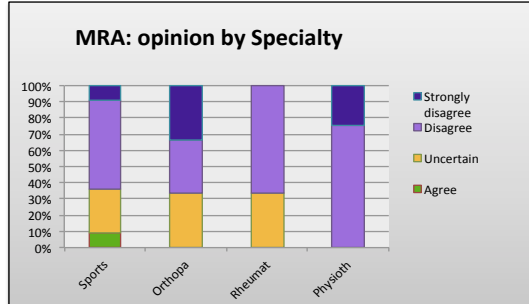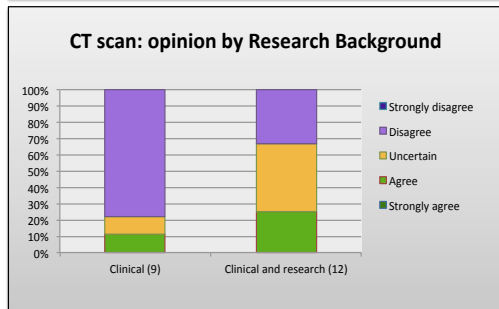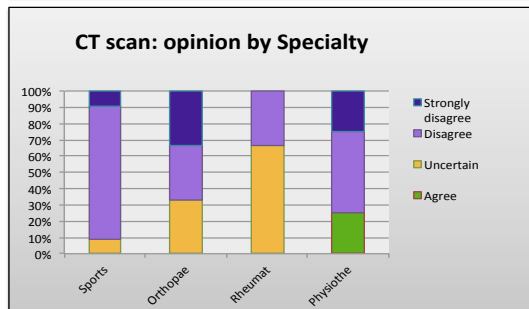

## PROMs

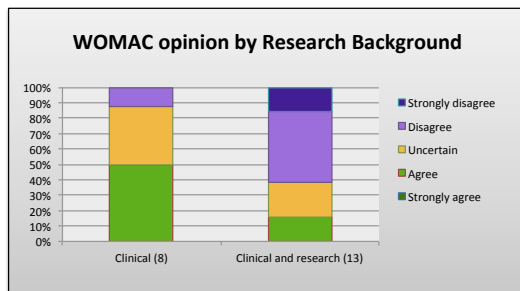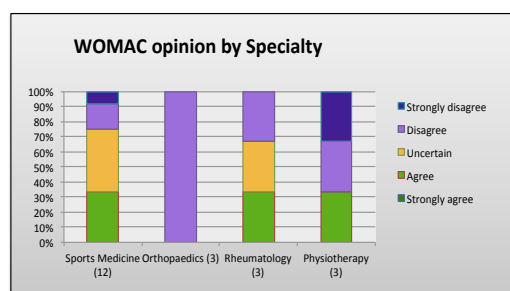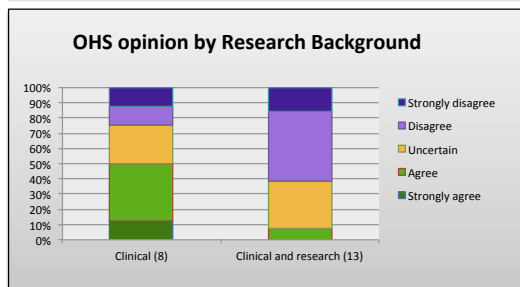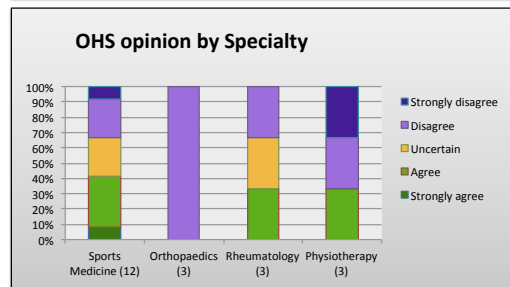

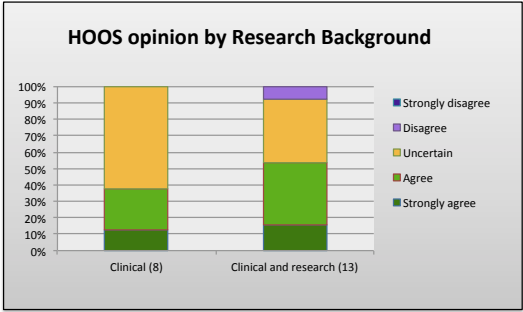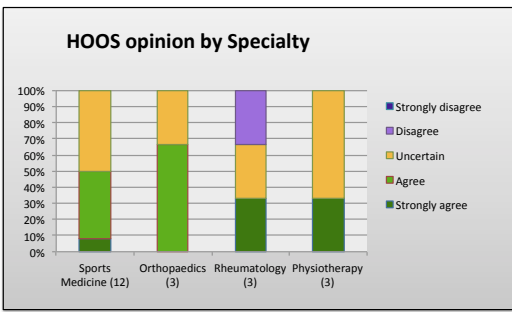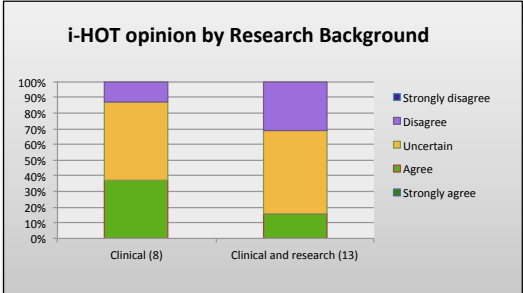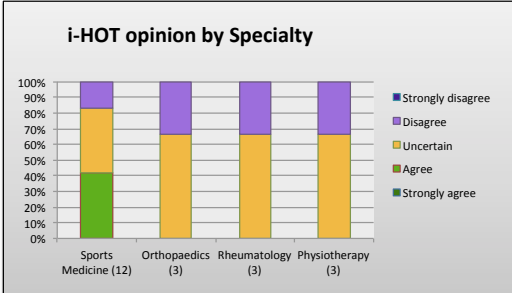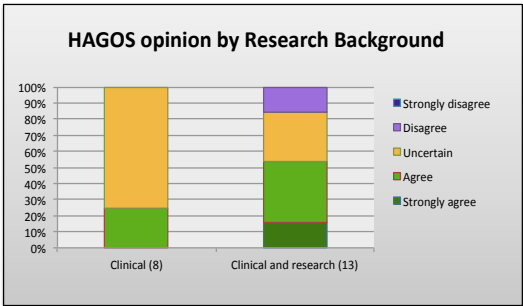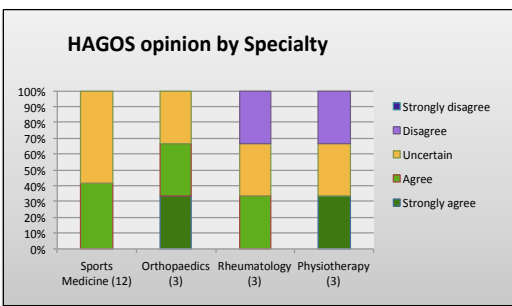

## Blood Test

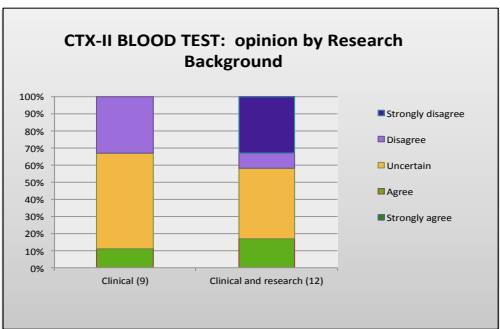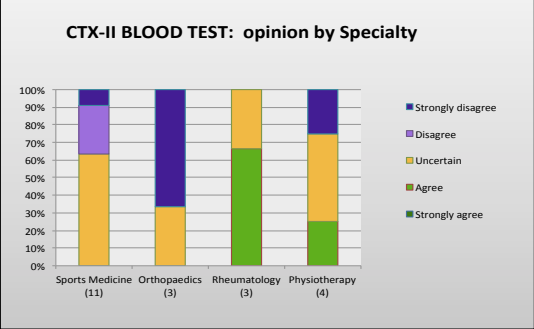

Examination

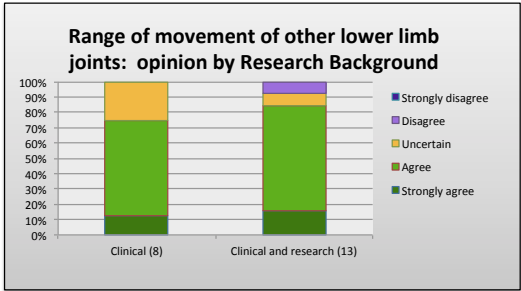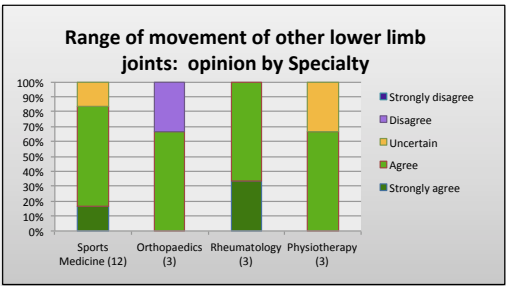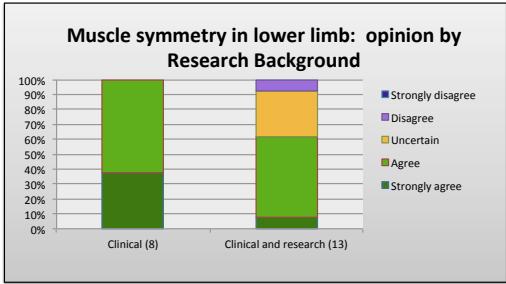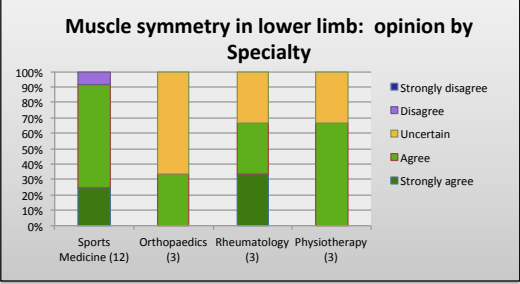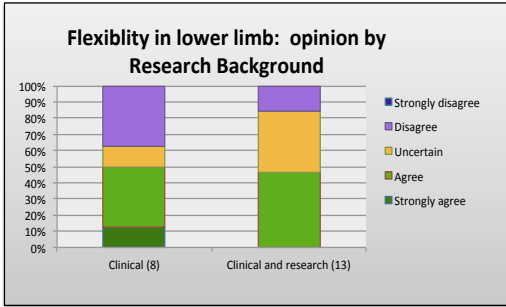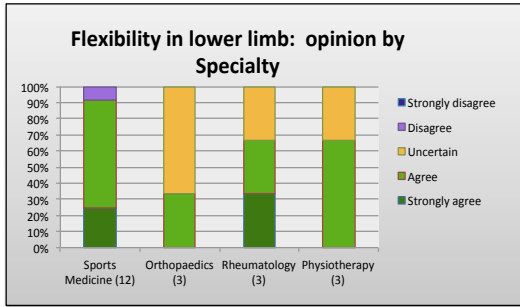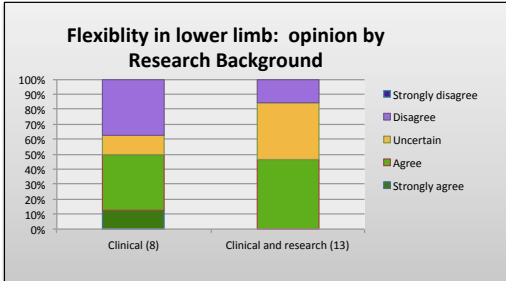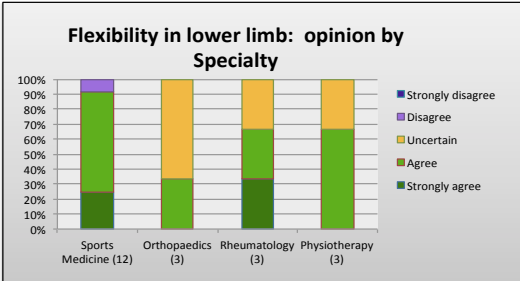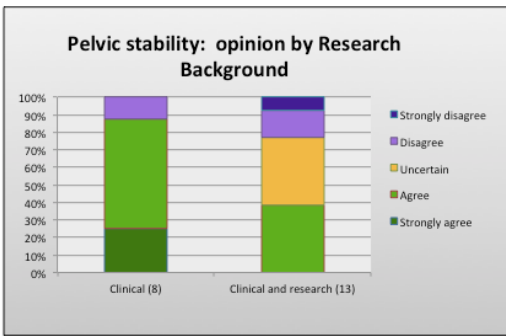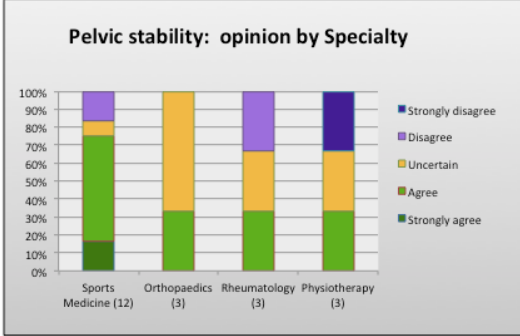

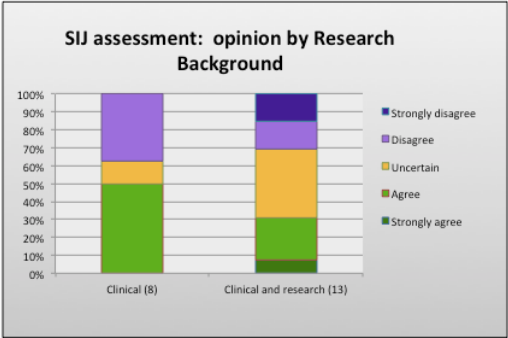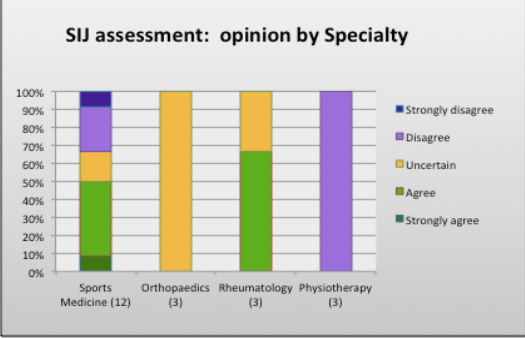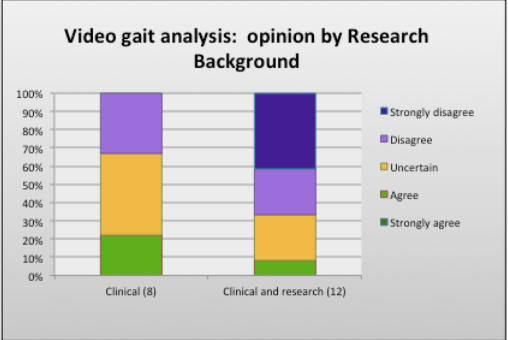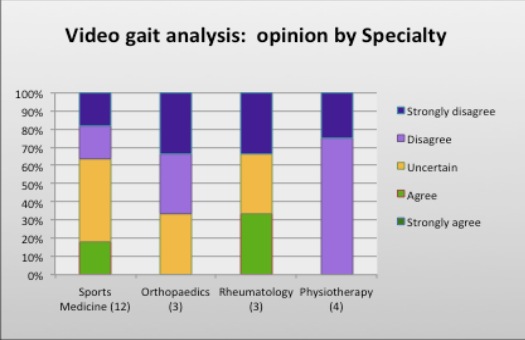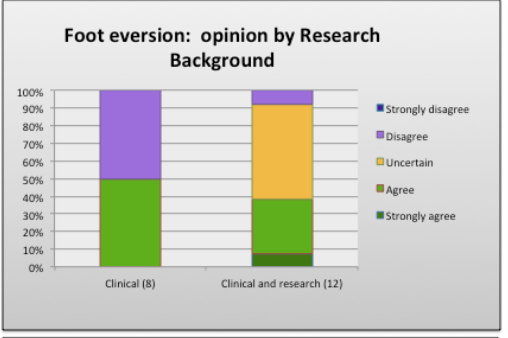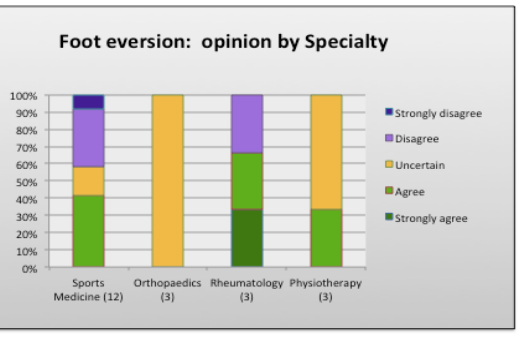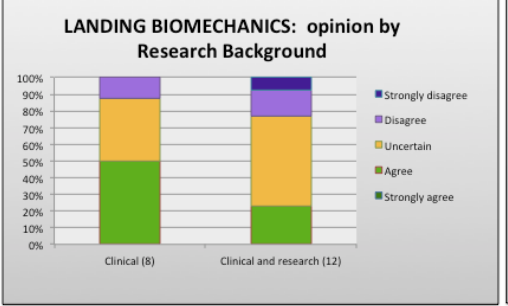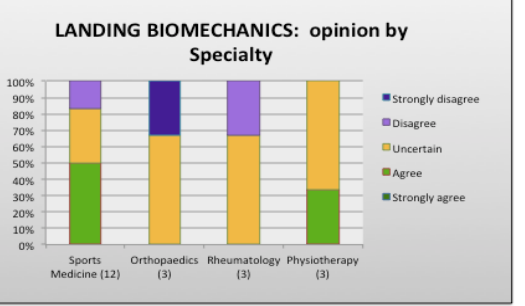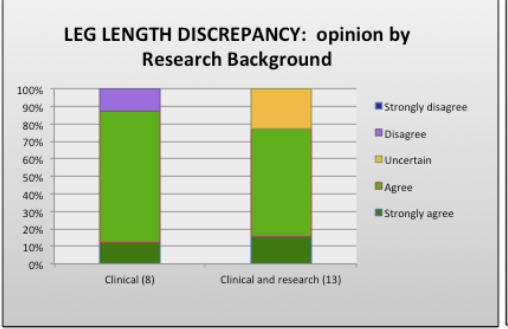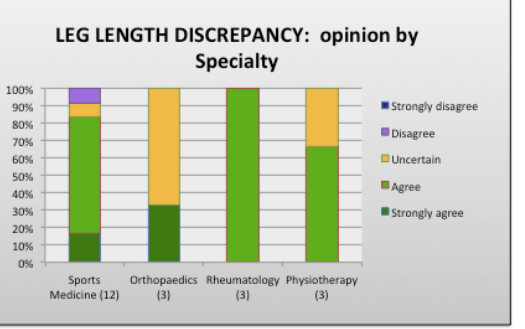

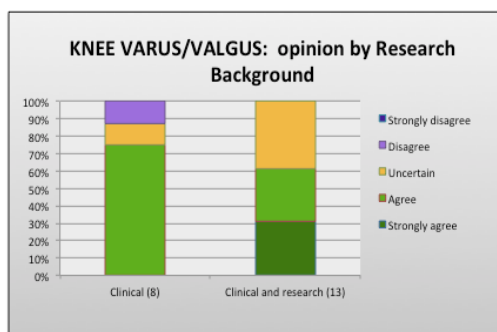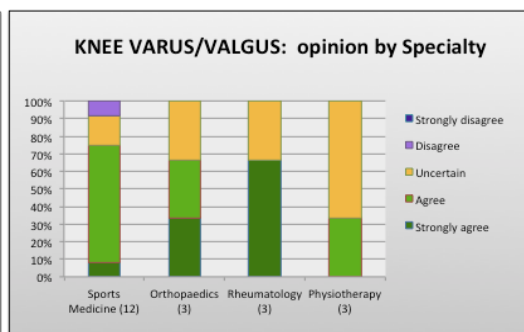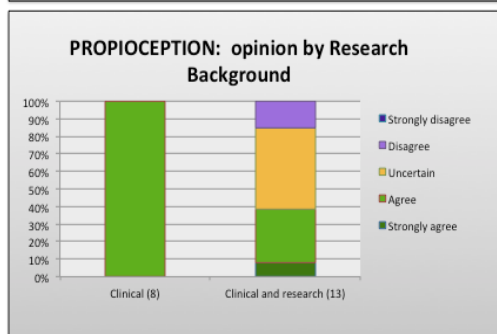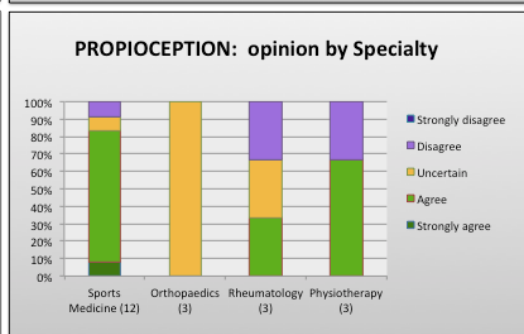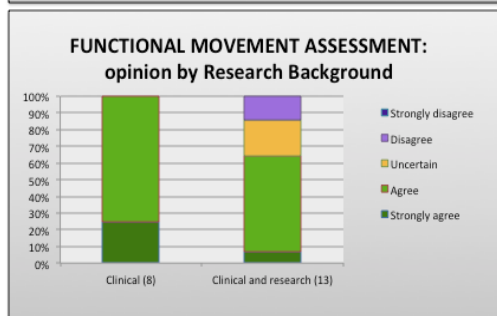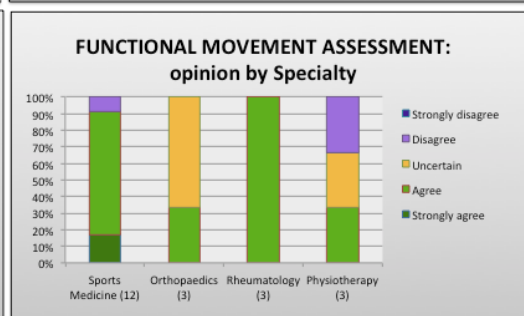

## History

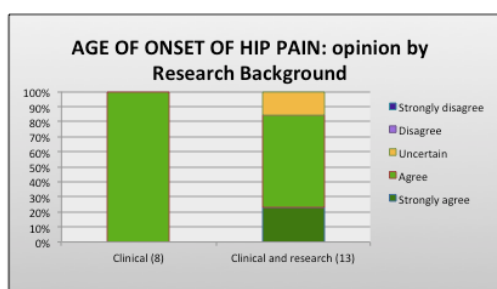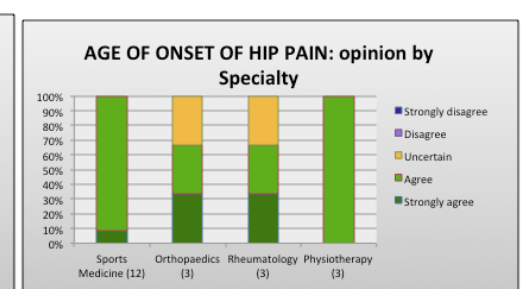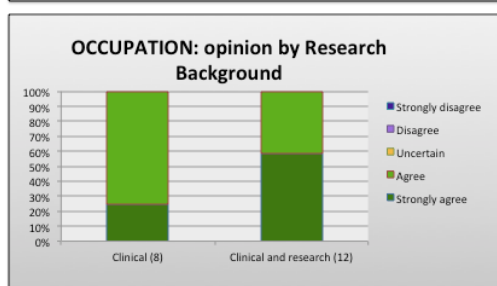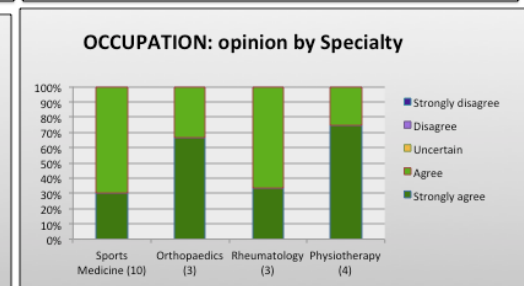

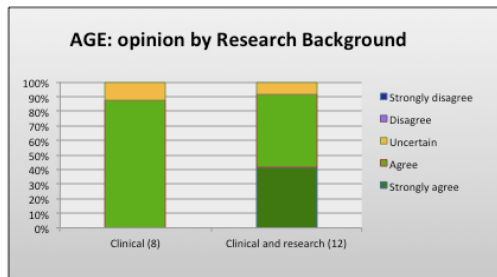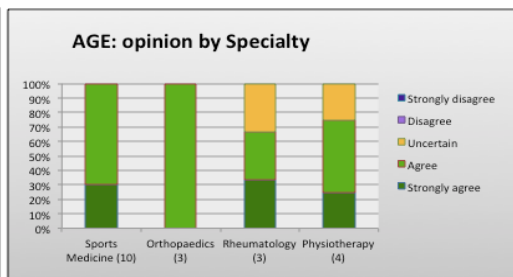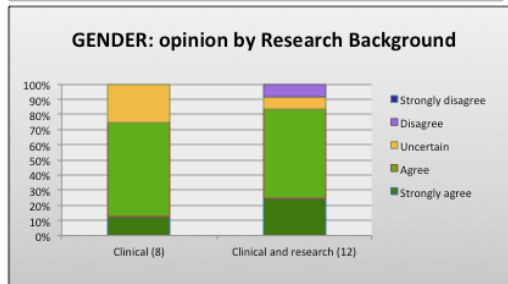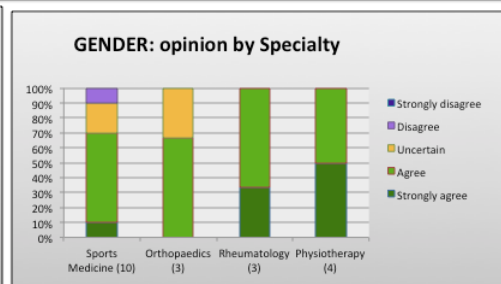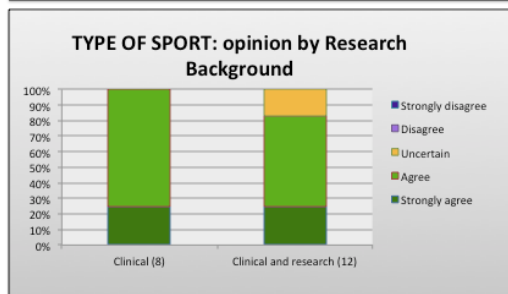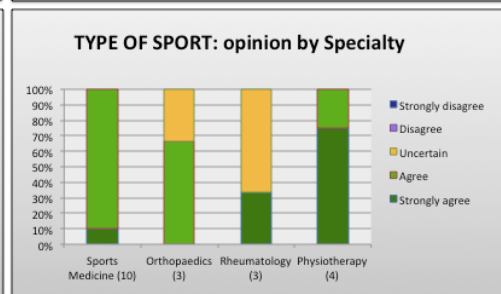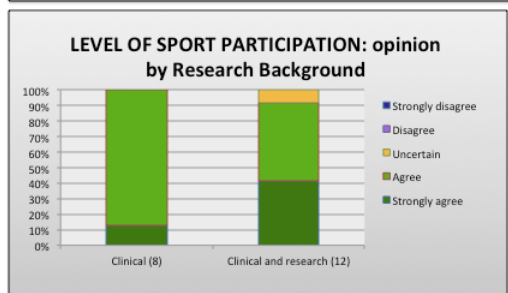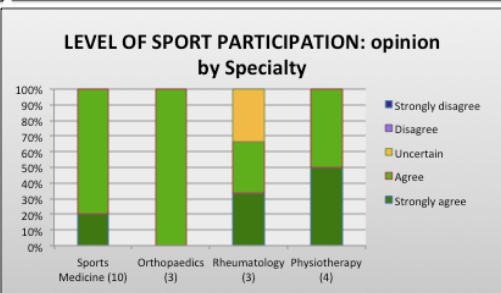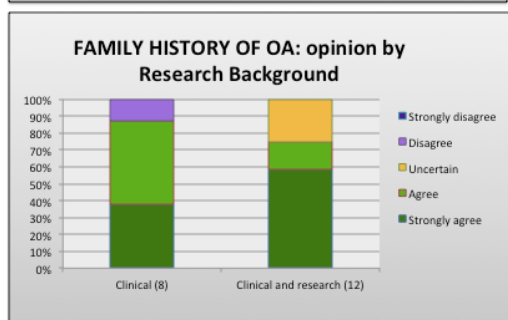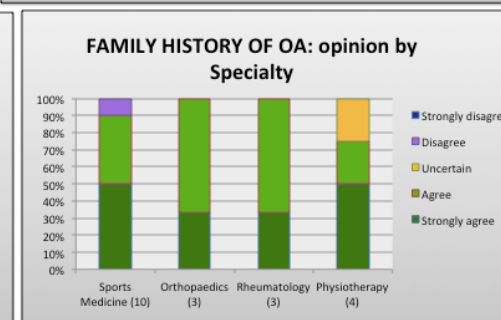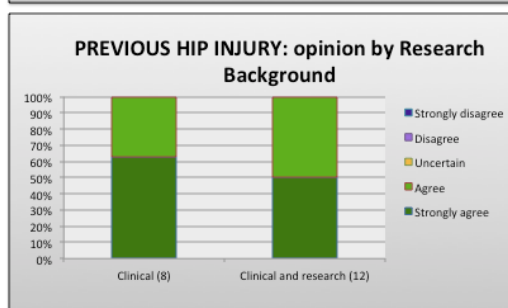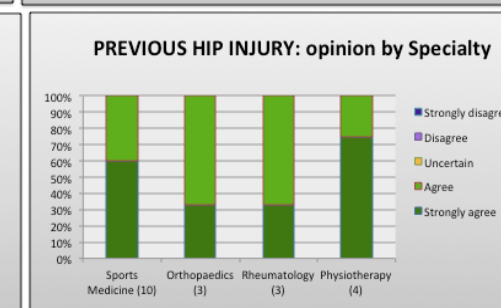

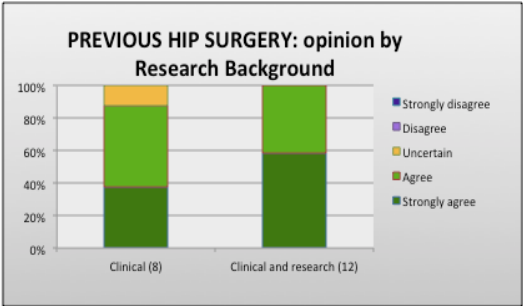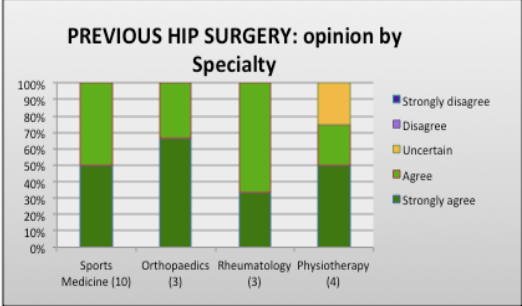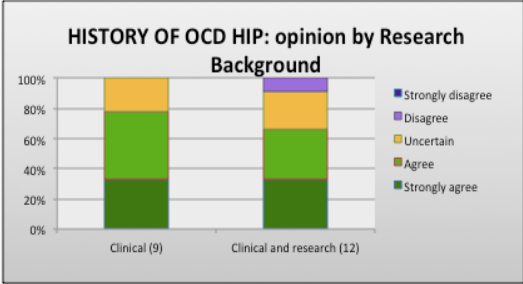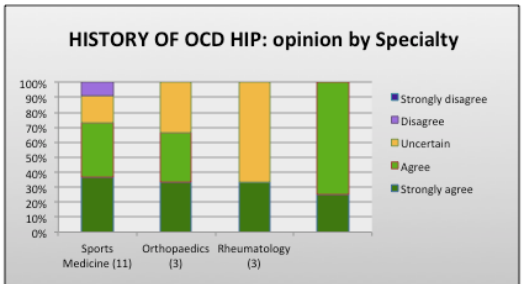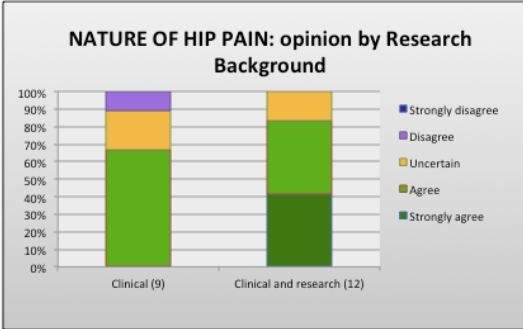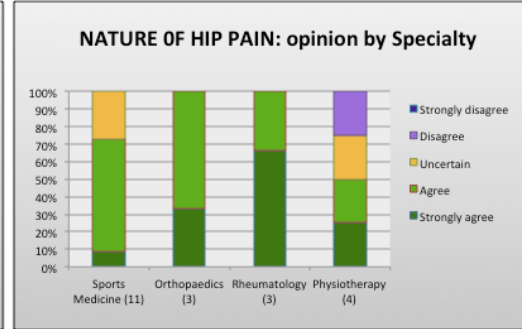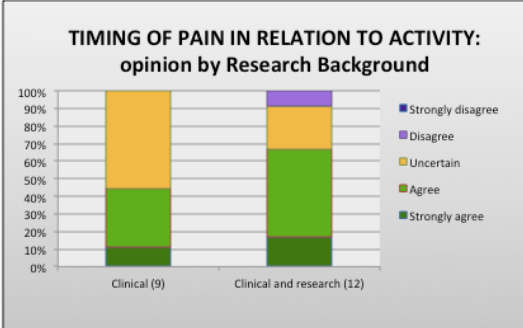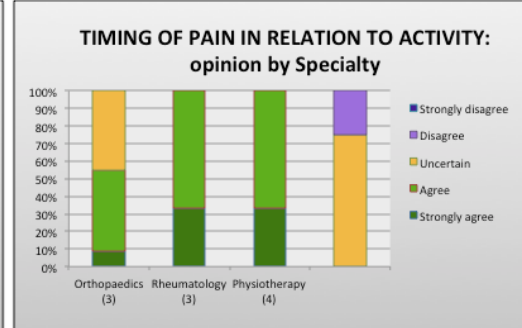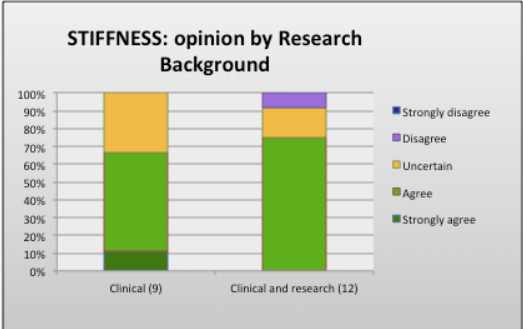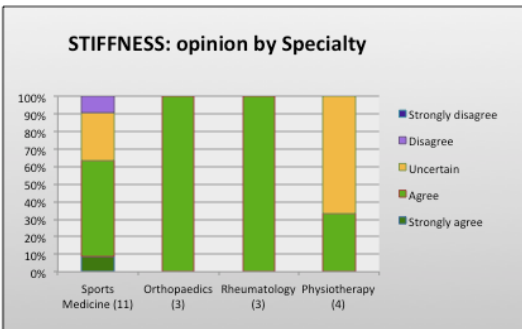



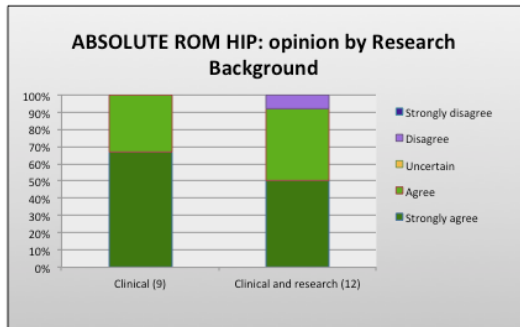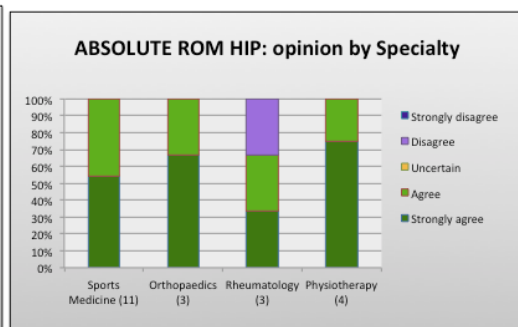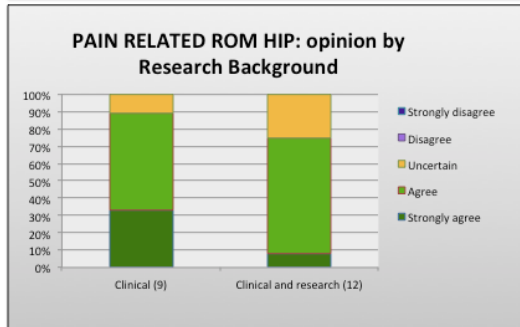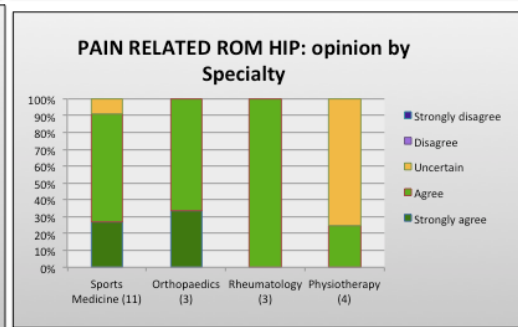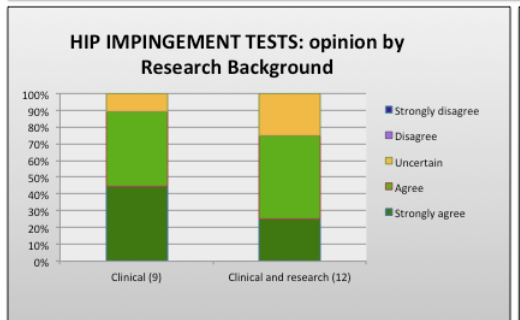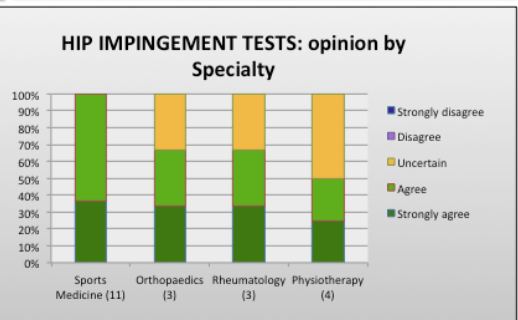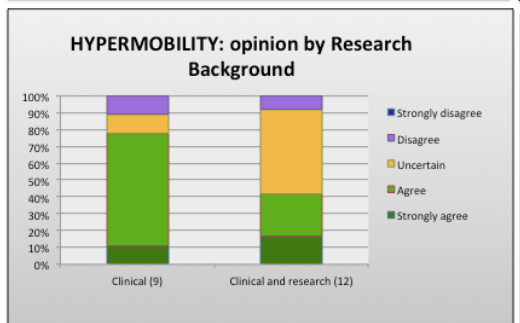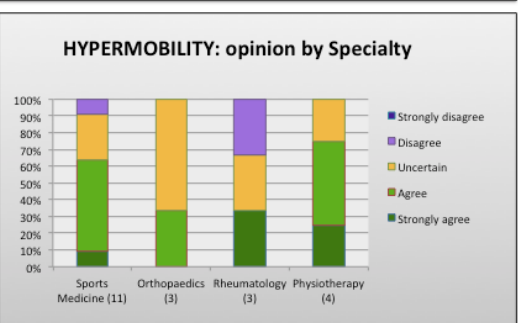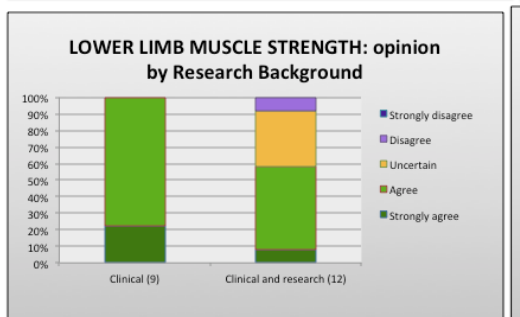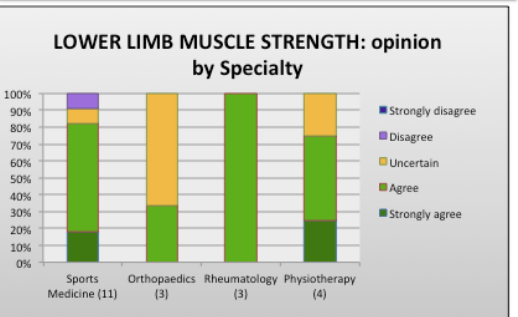

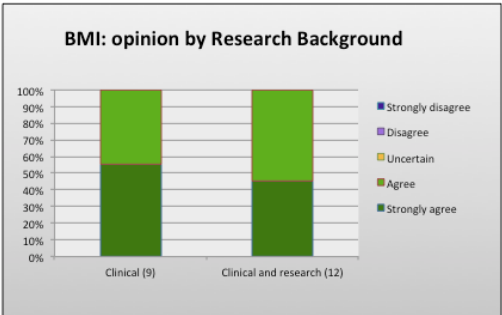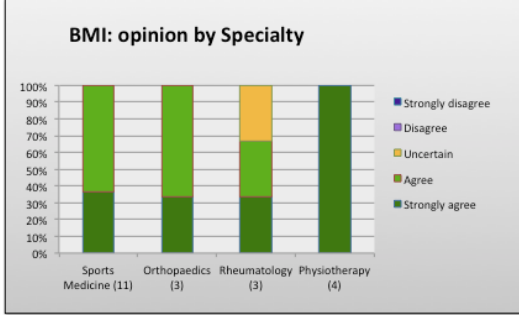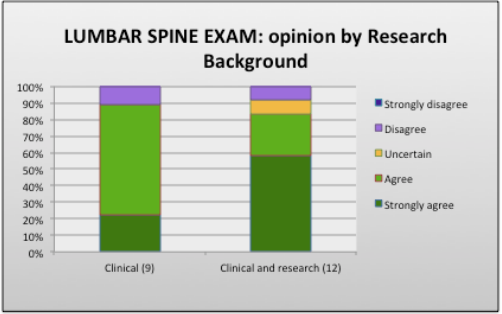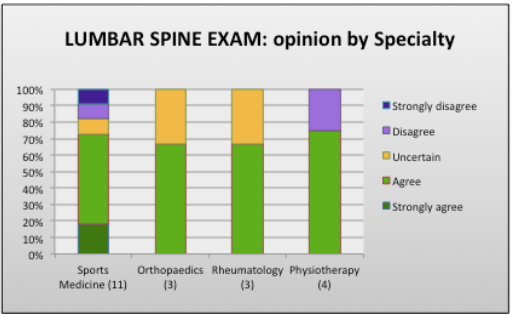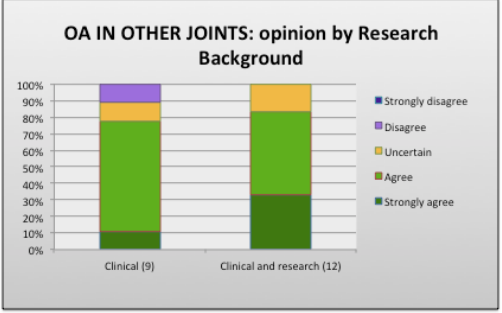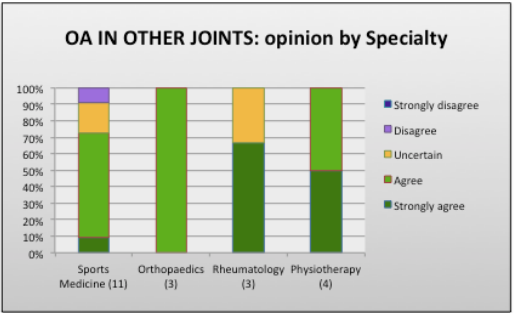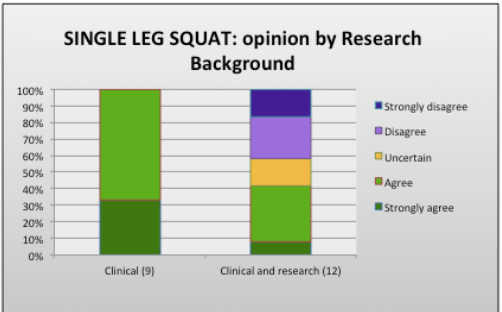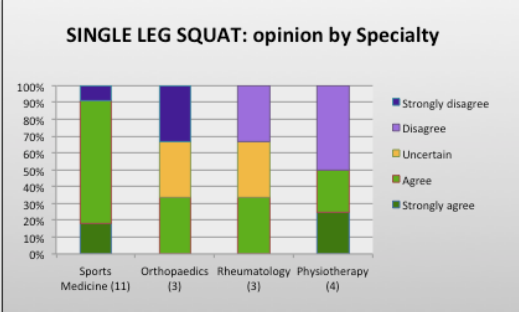

Supplement: bmjopen-2015-007609supp3.pdf [file bmjopen-2015-007609supp3.pdf]
