# Supplementary material for: Assessing risk factors for early hip osteoarthritis in activity-related hip pain: a Delphi study
Source: HighWire-hosted journal article supplement (doi:10.1136/bmjopen-2015-007609), 2015-09-01
Supplement: bmjopen-2015-007609supp1.pdf [file bmjopen-2015-007609supp1.pdf]

## Additional Data File 1 – list of all search terms derived from Delphi experts' suggestions

| SEARCH TERMS FROM ROUND 1 SUGGESTIONS |       |                          |            |                             |
|---------------------------------------|-------|--------------------------|------------|-----------------------------|
| HISTORY                               | PROMs | RADIOLOGY                | BLOOD TEST | EXAMINATION                 |
| Age                                   | WOMAC | X-RAY/plain radiograph   | CTX-II     | Hip ROM (hip flexion, hip   |
| Gender                                | HOOS  | FAI view radiograph      |            | IR, asymmetry, painful      |
| Occupation                            | OHS   | CT SCAN                  |            | end range movement,         |
| Family history OA                     | HAGOS | MRA/ MR arthrogram       |            | combined flexion/internal   |
| Family history THR                    | i-HOT | MRI/hip dysplasia/FAI/   |            | rotation,                   |
| History of OA                         |       | T2 mapping/physiological |            | ROM knee, ROM ankle         |
| History of hip surgery                |       | MRI/3T MRI/7T MRI        |            | Muscle symmetry             |
| History of OCD                        |       |                          |            | Muscle strength             |
| History of hip injury                 |       |                          |            | (adductors, hip flexors,    |
| Type of sport                         |       |                          |            | gluteals, ITB, hamstrings)  |
| Level of sport                        |       |                          |            | Impingement tests,          |
| Hip stiffness                         |       |                          |            | (Quadrant testing, FADIR    |
| Hip pain (duration,                   |       |                          |            | test, FABER test).          |
| nature, severity,                     |       |                          |            | Joint movement patterns     |
| age of onset)                         |       |                          |            | SIJ assessment              |
|                                       |       |                          |            | Lumbar spine assessment     |
|                                       |       |                          |            | Heberdon's nodes            |
|                                       |       |                          |            | Knee OA                     |
|                                       |       |                          |            | Functional Movement         |
|                                       |       |                          |            | Scores                      |
|                                       |       |                          |            | Biomechanics (leg length    |
|                                       |       |                          |            | discrepancy, knee varus,    |
|                                       |       |                          |            | knee valgus, foot eversion, |
|                                       |       |                          |            | video gait analysis, pelvic |
|                                       |       |                          |            | tilt)                       |
|                                       |       |                          |            | Pelvic stability            |
|                                       |       |                          |            | Single leg squat            |
|                                       |       |                          |            | Landing biomechanics        |
|                                       |       |                          |            | Proprioception              |
|                                       |       |                          |            | Hypermobility               |
|                                       |       |                          |            | BMI                         |
